# Supplementary material for: Half-sandwich cycloruthenated complexes from aryloxazolines: synthesis, structures, and catalytic activities
Source: Royal Society of Chemistry journal article supplement (doi:10.1039/c6dt02734b), 2016-01-01
Supplement: c6dt02734b1.pdf [file c6dt02734b1.pdf]

Electronic Supporting Information for

**Half-sandwich Cycloruthenated Complexes from  
Aryloxazolines: Synthesis, Structures, and Catalytic  
activities**

Wei-Guo Jia, Tai Zhang, Dong Xie, Qiu-Tong Xu, Shuo Ling and Qing Zhang

College of Chemistry and Materials Science, Center for Nano Science and Technology, The Key  
Laboratory of Functional Molecular Solids, Ministry of Education, Anhui Laboratory of  
Molecular-Based Materials, Anhui Normal University, Wuhu, 241000, China

\*Corresponding author. Tel.: +86-0553-3883513; Fax: +86-0553-3869302

E-mail address: [wgjiasy@mail.ahnu.edu.cn](mailto:wgjiasy@mail.ahnu.edu.cn) (W. -G. Jia)

**Contents**

1. Copies of  $^1\text{H}$ ,  $^{13}\text{C}$  NMR Spectra of half-sandwich ruthenium complex **2a-2g**  
(FigureS1-FigureS14).

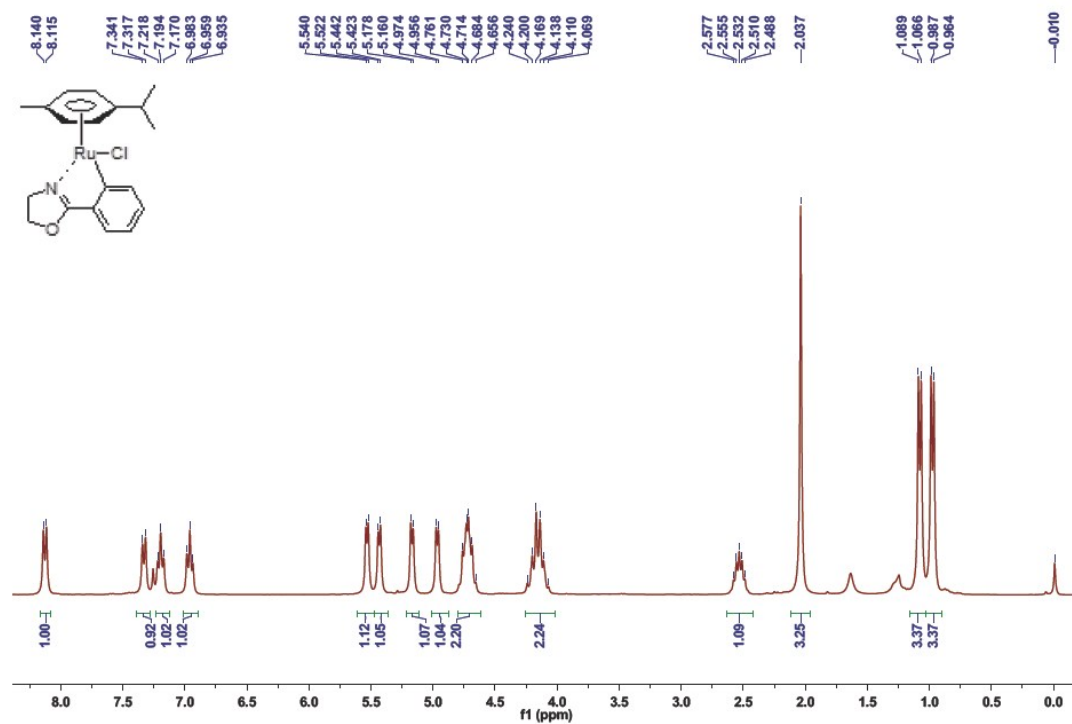

**Figure S1.** The  $^1\text{H}$  NMR of half-sandwich ruthenium complex **2a**

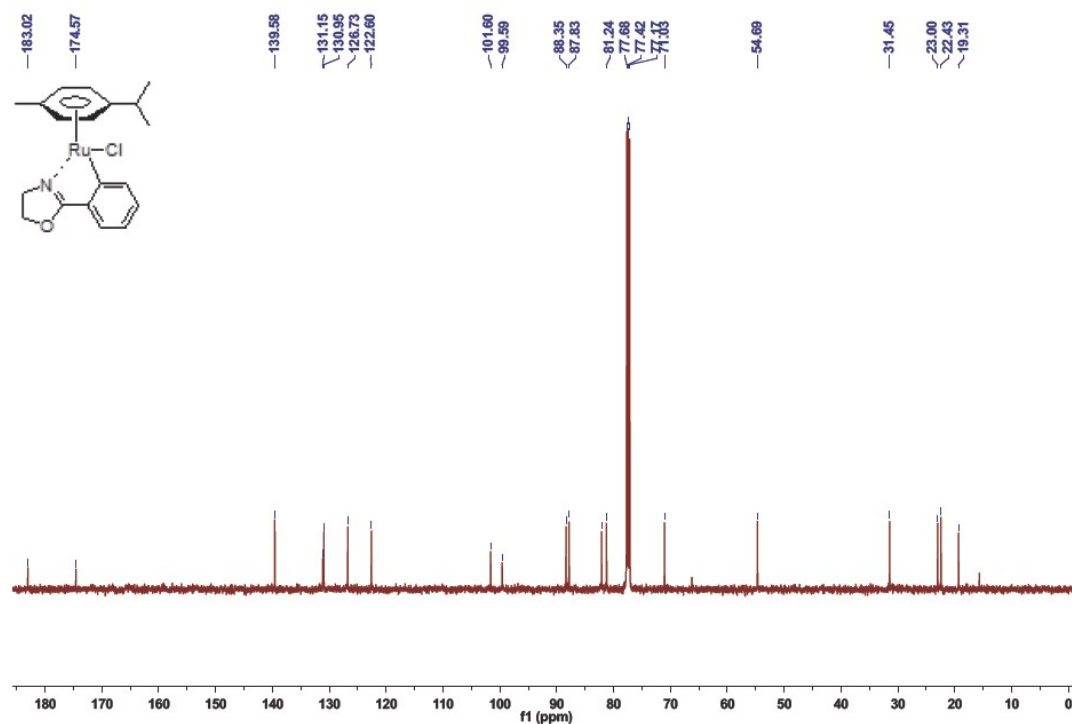

**Figure S2.** The  $^{13}\text{C}$  NMR of half-sandwich ruthenium complex **2a**

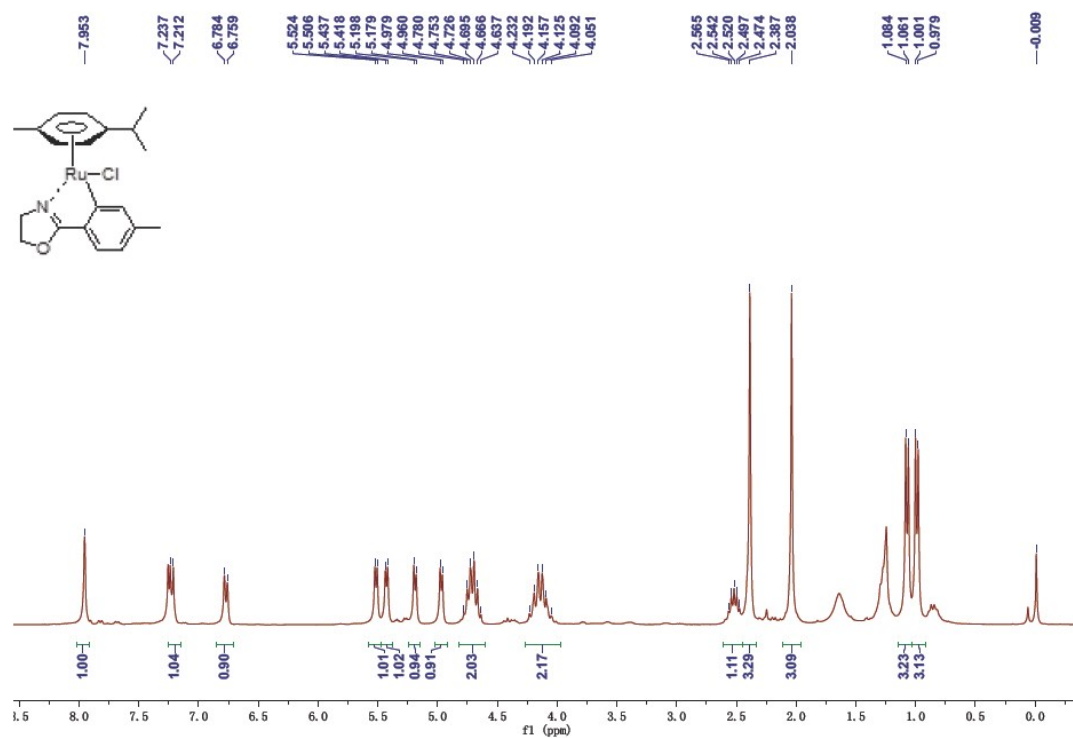

**Figure S3.** The  $^1\text{H}$  NMR of half-sandwich ruthenium complex **2b**

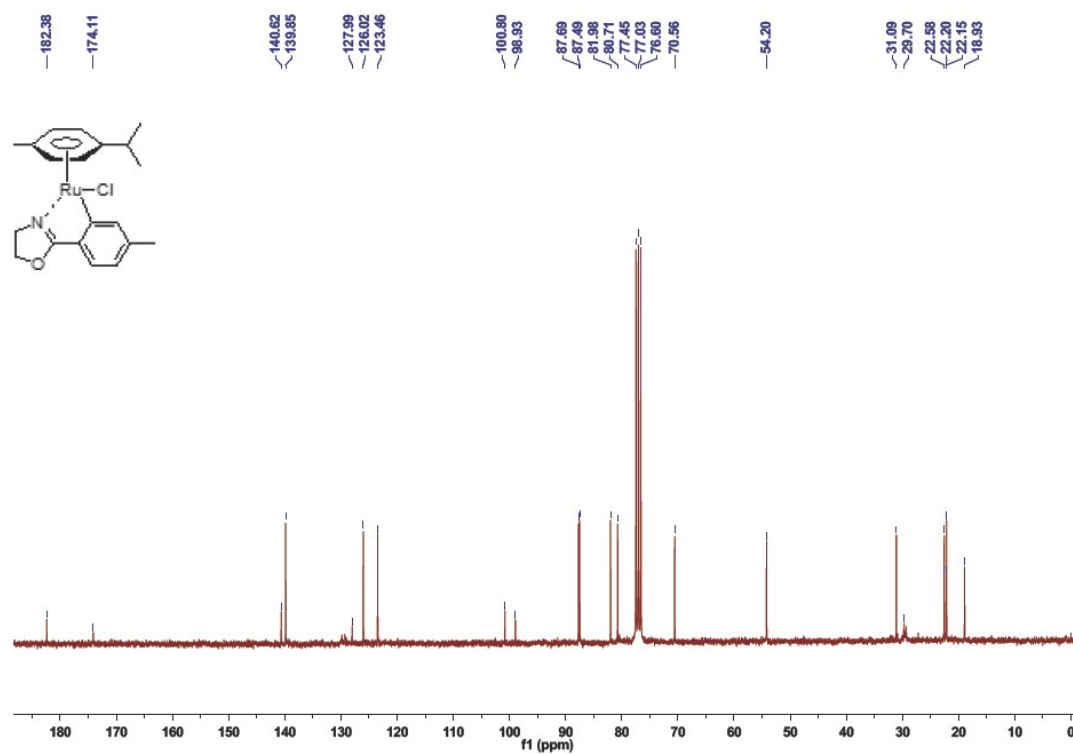

**Figure S4.** The  $^{13}\text{C}$  NMR of half-sandwich ruthenium complex **2b**

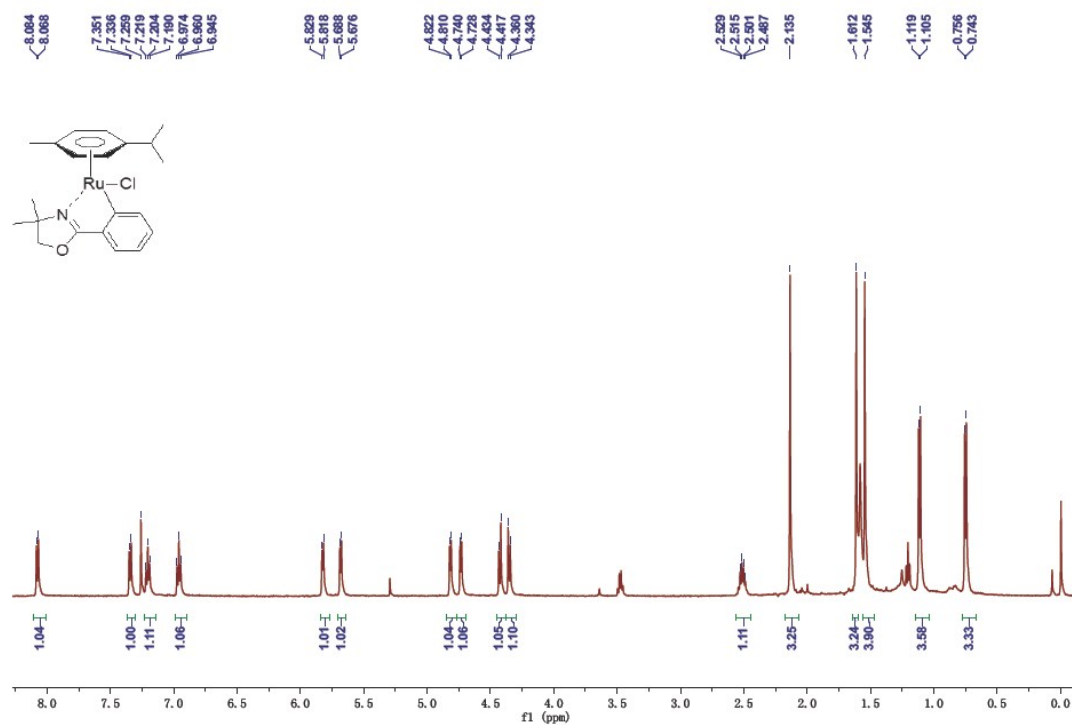

**Figure S5.** The  $^1\text{H}$  NMR of half-sandwich ruthenium complex **2c**

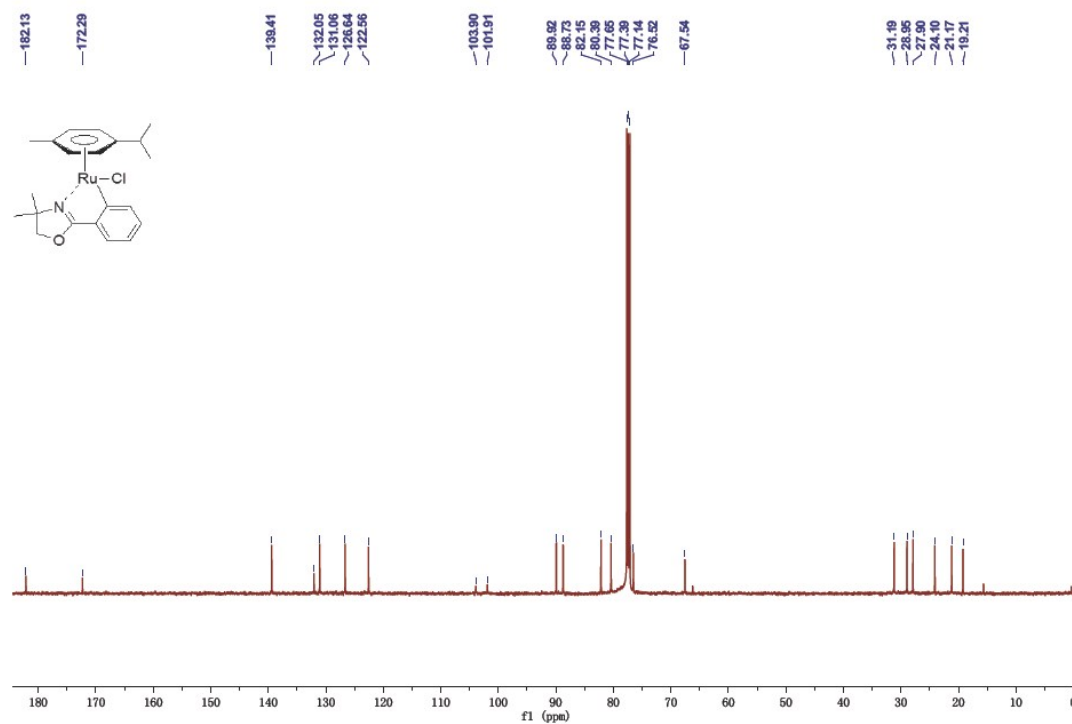

**Figure S6.** The  $^{13}\text{C}$  NMR of half-sandwich ruthenium complex **2c**

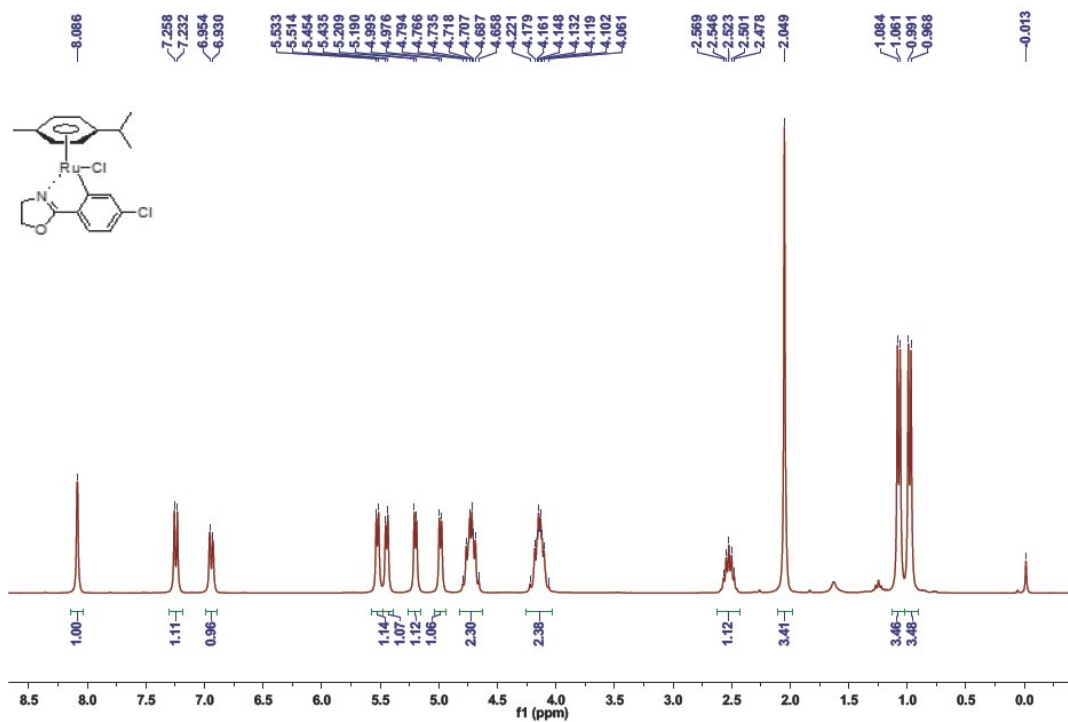

**Figure S7.** The  $^1\text{H}$  NMR of half-sandwich ruthenium complex **2d**

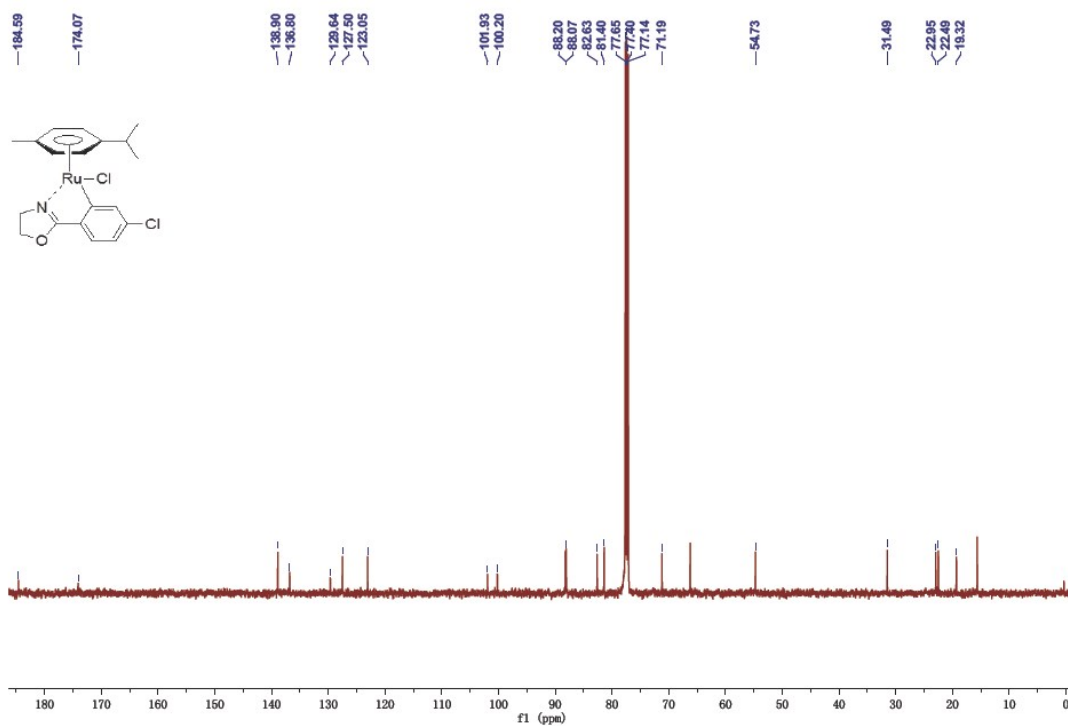

**Figure S8.** The  $^{13}\text{C}$  NMR of half-sandwich ruthenium complex **2d**

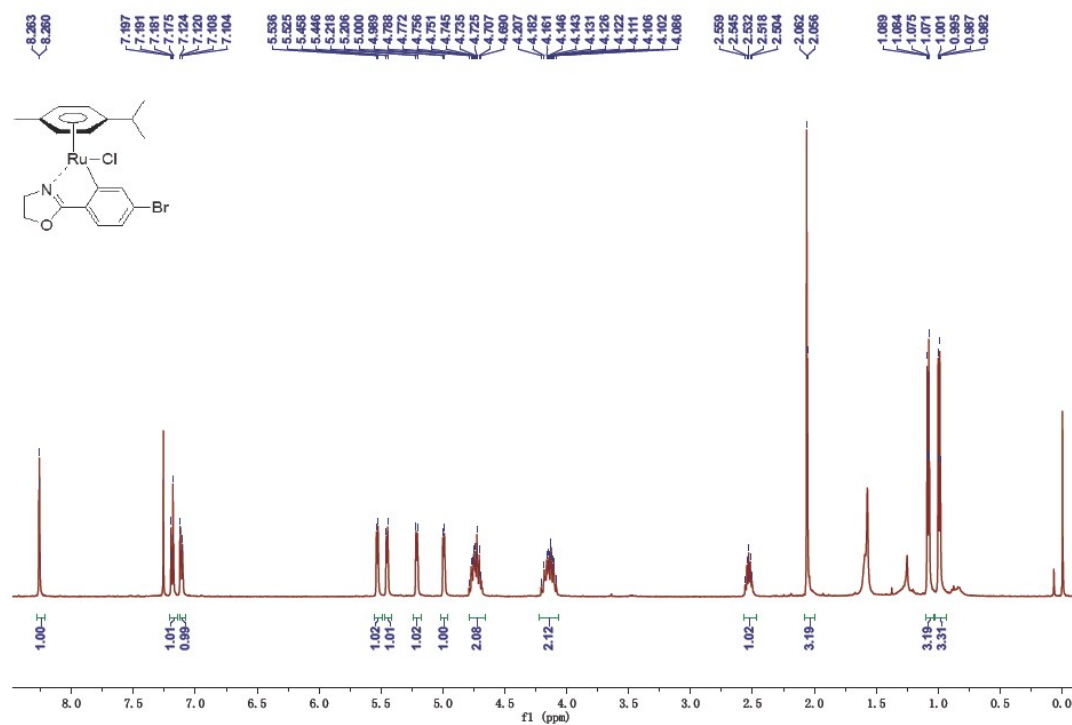

**Figure S9.** The <sup>1</sup>H NMR of half-sandwich ruthenium complex **2e**

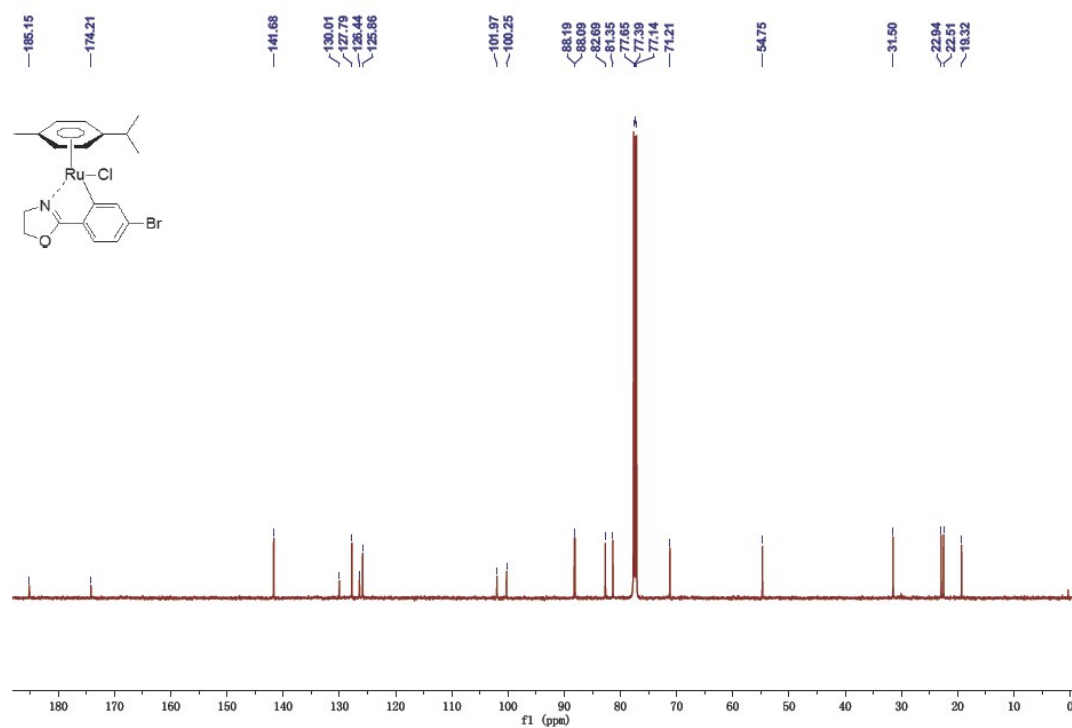

**Figure S10.** The <sup>13</sup>C NMR of half-sandwich ruthenium complex **2e**

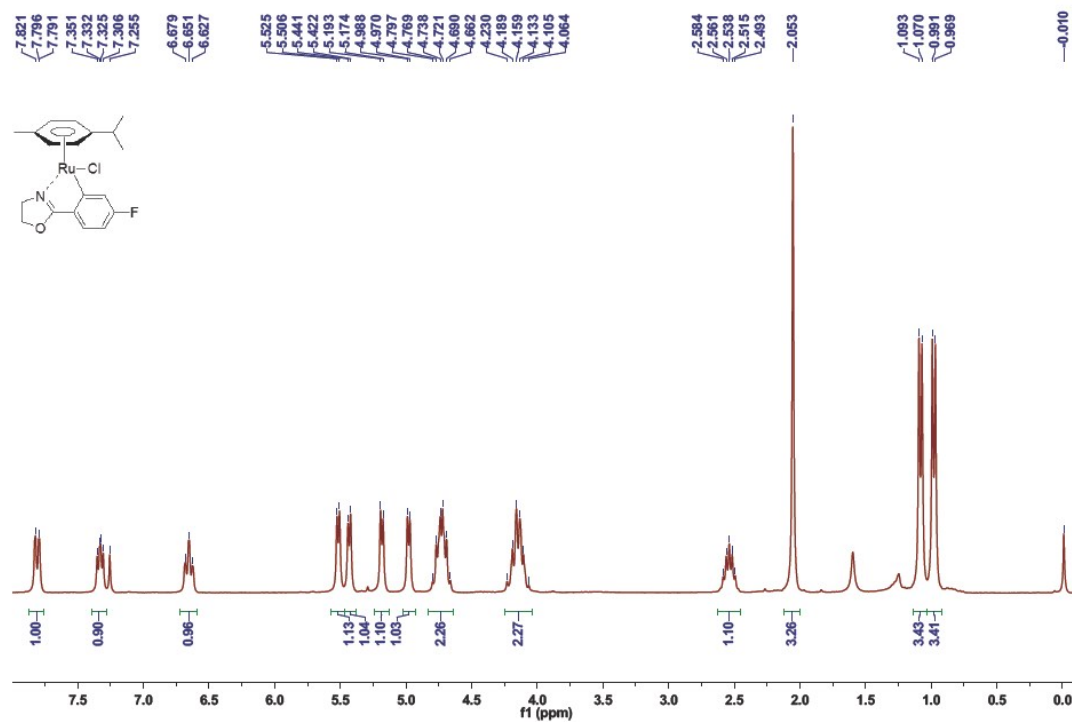

Figure S11. The  $^1\text{H}$  NMR of half-sandwich ruthenium complex **2f**

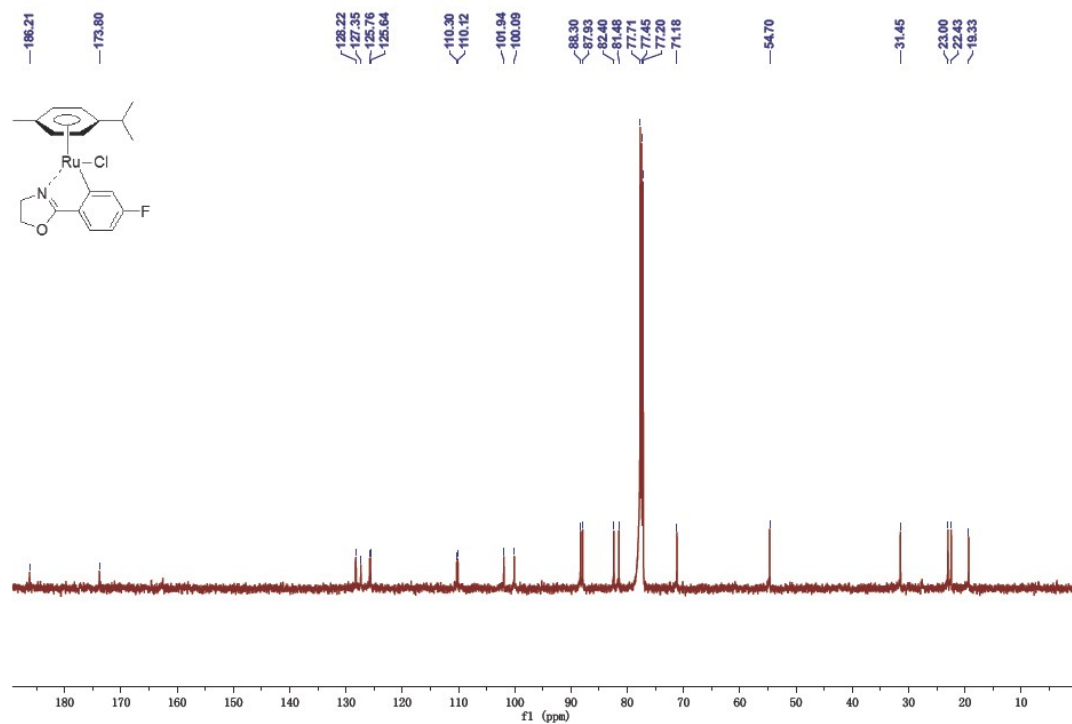

Figure S12. The  $^{13}\text{C}$  NMR of half-sandwich ruthenium complex **2f**

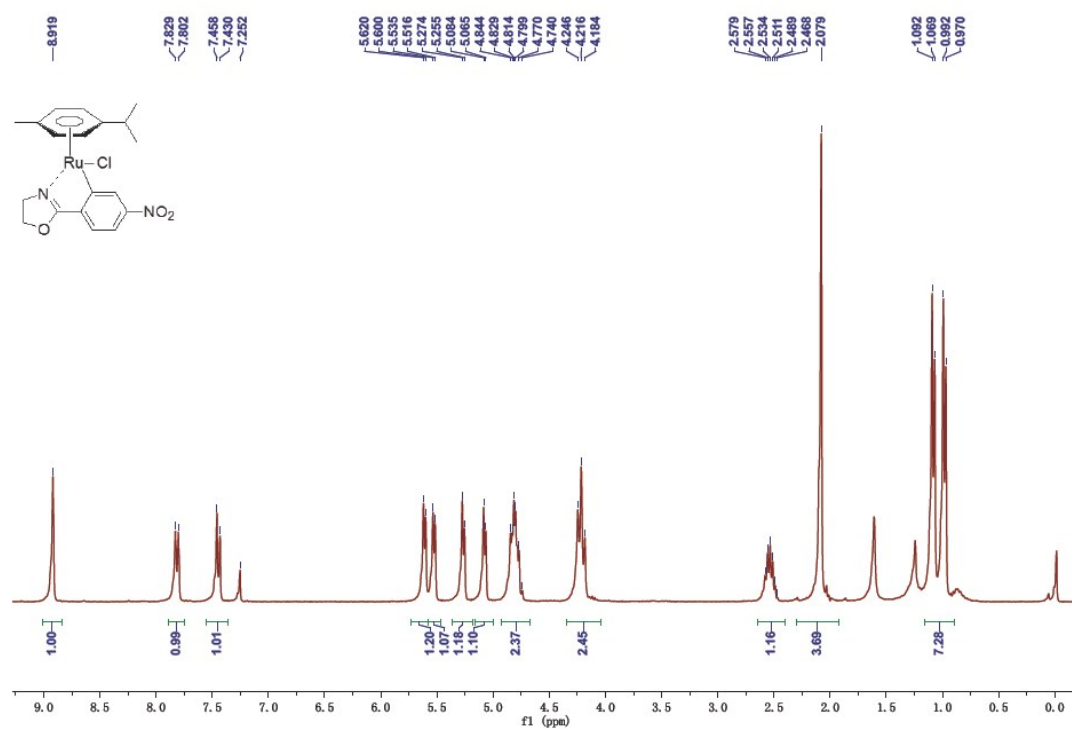

**Figure S13.** The <sup>1</sup>H NMR of half-sandwich ruthenium complex **2g**

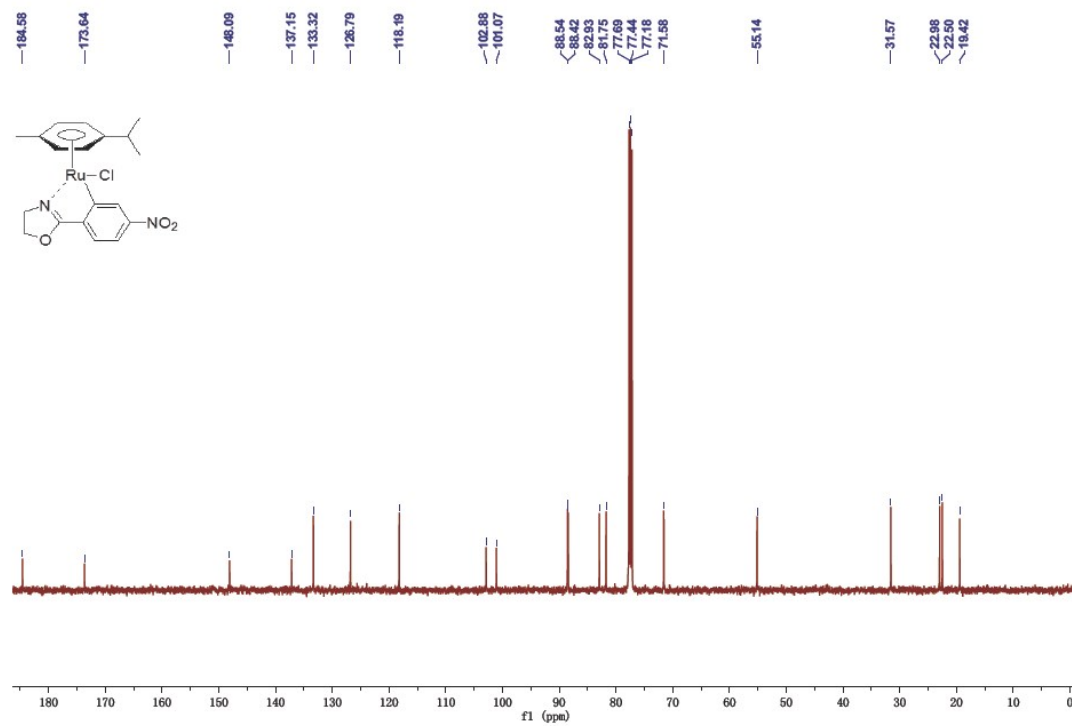

**Figure S14.** The <sup>13</sup>C NMR of half-sandwich ruthenium complex **2g**
